# Supplementary material for: Porous CuCo2O4 nanocubes wrapped by reduced graphene oxide as high-performance lithium-ion battery anodes
Source: Royal Society of Chemistry journal article supplement (doi:10.1039/c4nr00446a), 2014-01-01
Supplement: c4nr00446a1.pdf [file c4nr00446a1.pdf]

Electronic Supplementary Information (ESI) for nanoscale

This journal is © The Royal Society of Chemistry 2014

**Supporting Information**

**Porous  $\text{CuCo}_2\text{O}_4$  Nanocubes wrapped by Reduced Graphene Oxide as  
High-Performance Lithium-Ion Battery Anodes**

**Wenpei Kang<sup>a</sup>, Yongbing Tang<sup>a,b\*</sup>, Wenye Li<sup>b,a</sup>, Zhangpeng Li<sup>a</sup>, Xia Yang<sup>a</sup>, Jun Xu<sup>a</sup> and  
Chun-Sing Lee<sup>a\*</sup>**

<sup>a</sup> Department of Physics and Materials Science and Center of Super-Diamond and Advanced Films (COSDAF), City University of Hong Kong, Hong Kong SAR, People's Republic of China.

<sup>b</sup> Functional Thin Films Research Center, Shenzhen Institutes of Advanced Technology, Chinese Academy of Sciences, People's Republic of China.

\*Corresponding author.

E-mail: [tangyb@siat.ac.cn](mailto:tangyb@siat.ac.cn); [apcslee@cityu.edu.hk](mailto:apcslee@cityu.edu.hk); Tel: +852-34427826

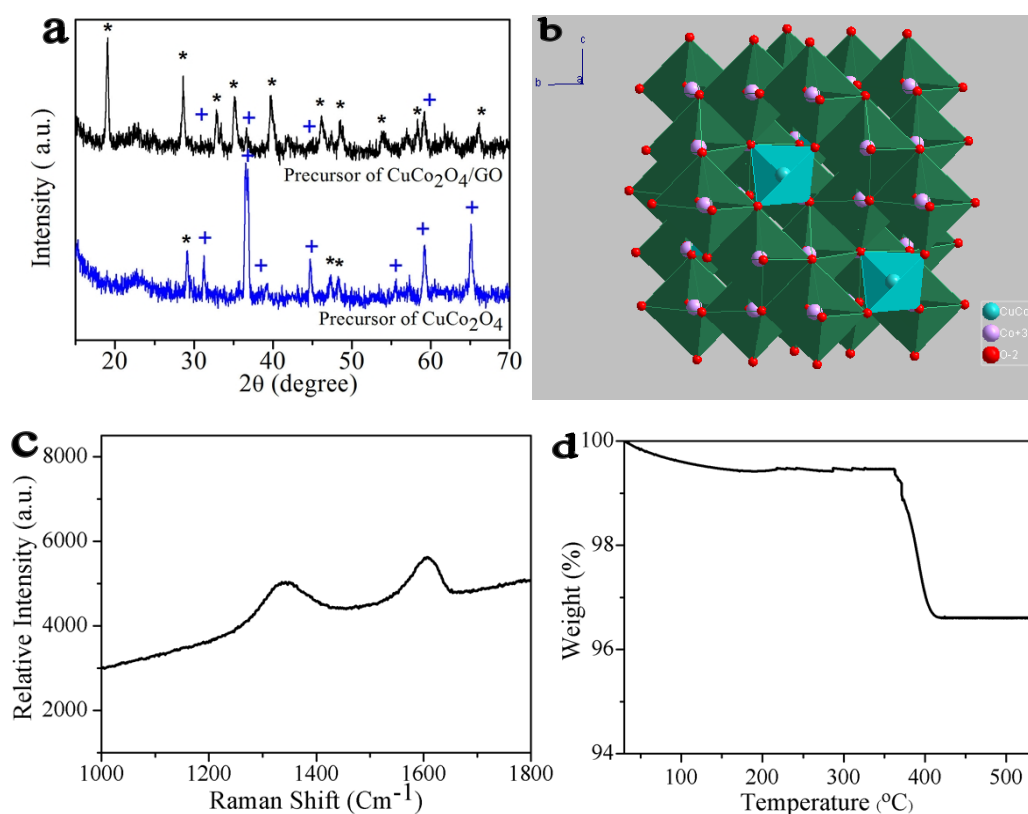

Fig. S1 (a) XRD patterns of the precursors of  $\text{CuCo}_2\text{O}_4/\text{GO}$  and  $\text{CuCo}_2\text{O}_4$ ; (b) crystal structure of  $\text{CuCo}_2\text{O}_4$ . (Peaks from cubic  $\text{CuCo}_2\text{O}_4$  and metal glycolates are marks with + and \* respectively. So the precursors are mixtures of copper-cobalt oxide and copper-cobalt poly alcohol salts with or without GO); (c) Raman spectra of GO, the  $I_D/I_G$  ratio of  $\text{CuCo}_2\text{O}_4/\text{rGO}$  composite is 0.9; (d) TGA patterns of porous  $\text{CuCo}_2\text{O}_4$  nanocubes/rGO composite measured in the air.

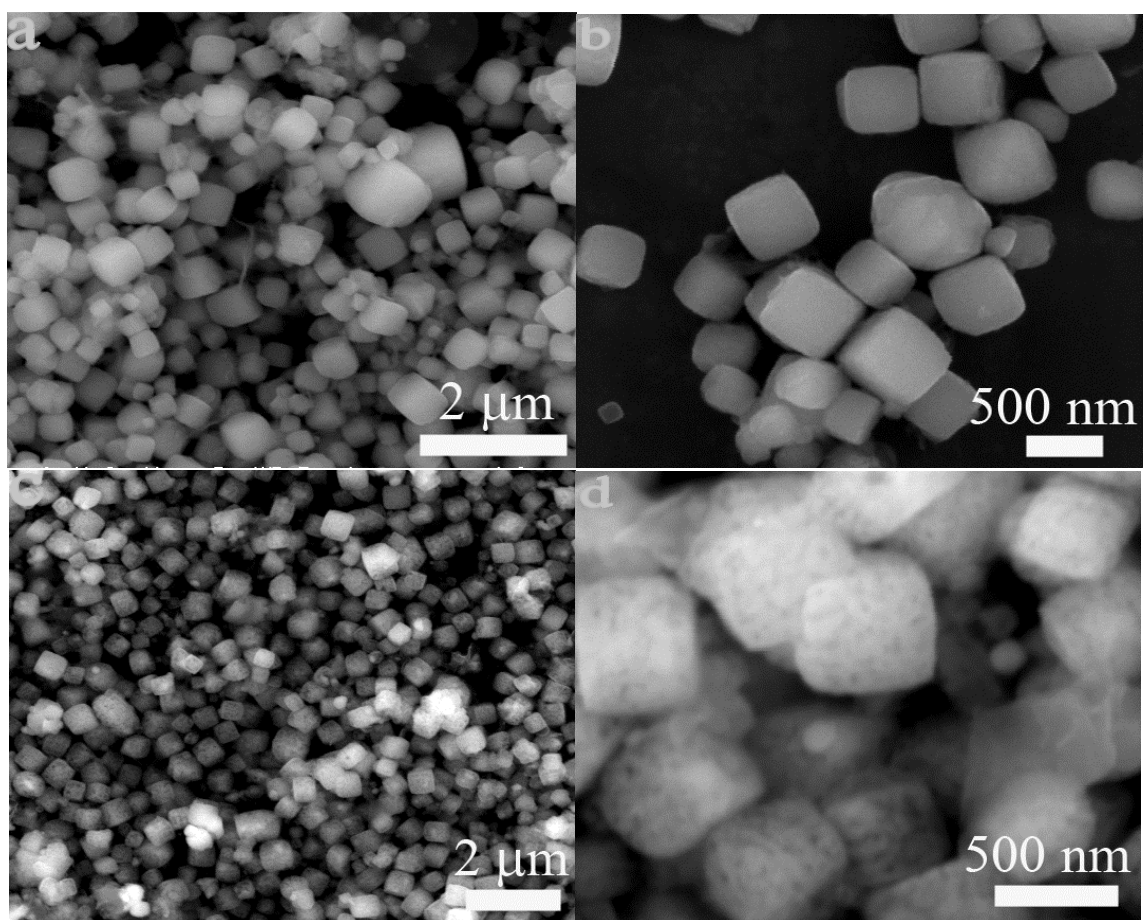

Fig. S2 SEM images of (a, b)  $\text{CuCo}_2\text{O}_4$  precursors and (c, d) the pristine  $\text{CuCo}_2\text{O}_4$  after calcination.

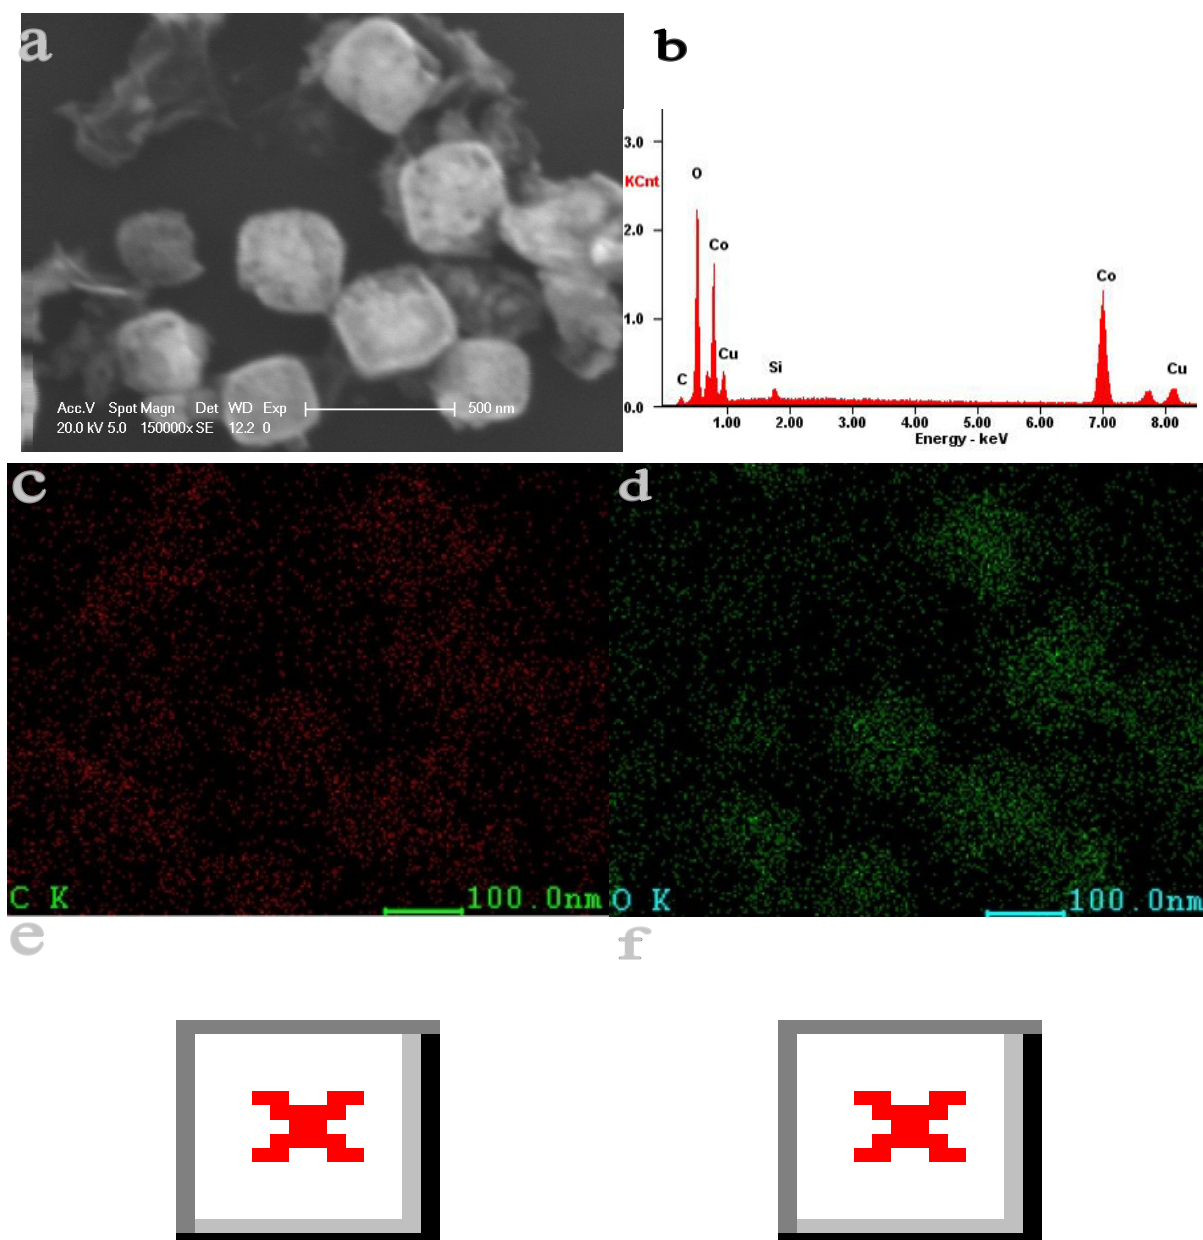

Fig. S3 (a) SEM image, (b) EDX spectrum (signal of Si is originated from the Si substrate), and (c) carbon, (d) oxygen, (e) cobalte, and (f) copper element mapping images of the  $\text{CuCo}_2\text{O}_4/\text{rGO}$  composite

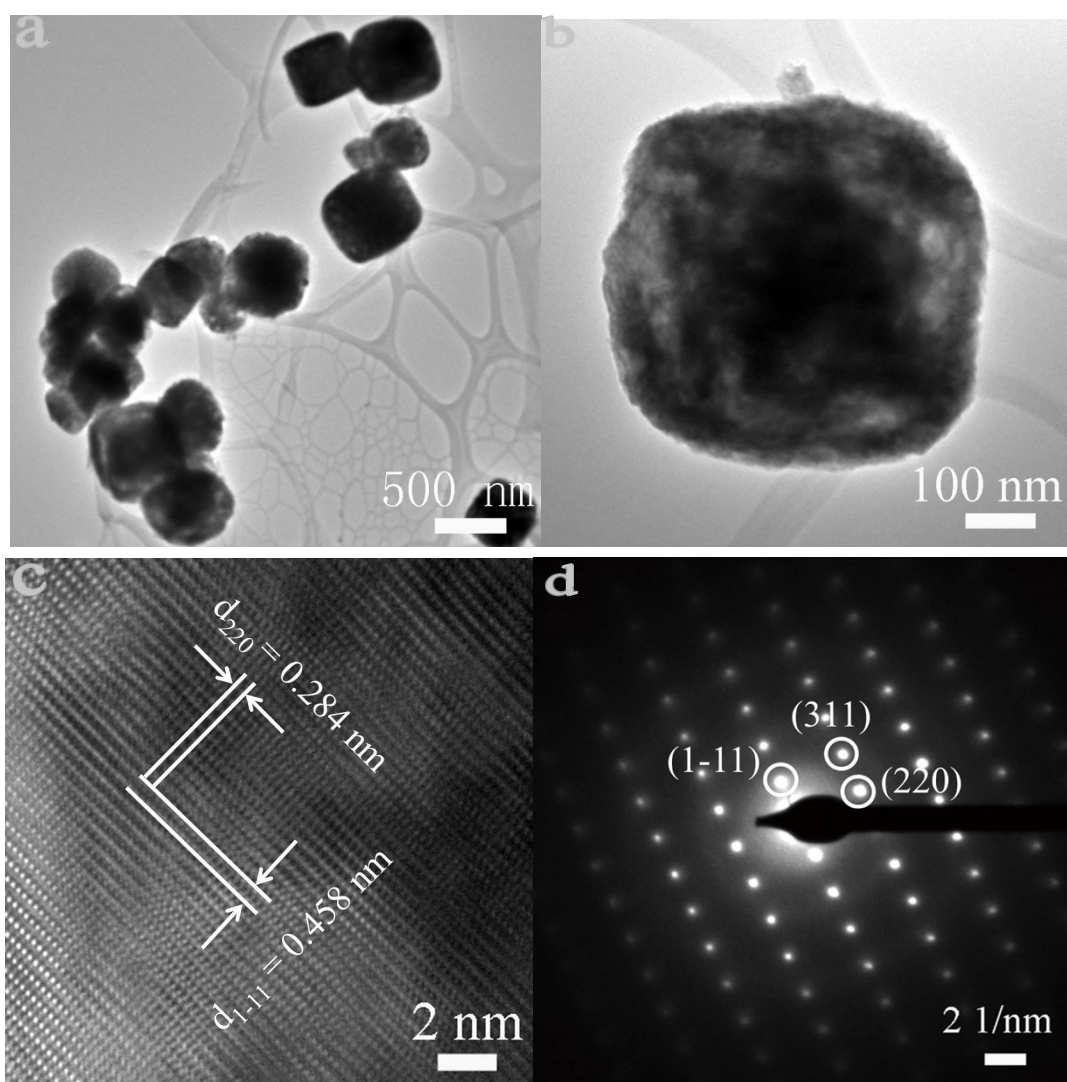

Fig. S4 a) and b) TEM image, c) HRTEM image, and d) SAED pattern of porous  $\text{CuCo}_2\text{O}_4$  nanocubes.

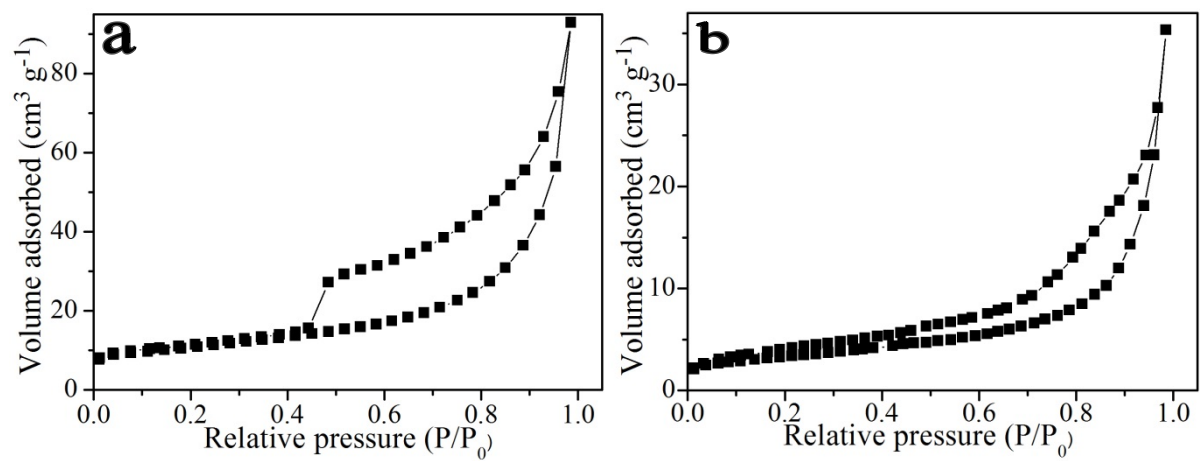

Fig. S5  $N_2$  adsorption-desorption isotherms of (a)  $CuCo_2O_4/GO$  composite and (b) pristine  $CuCo_2O_4$ .

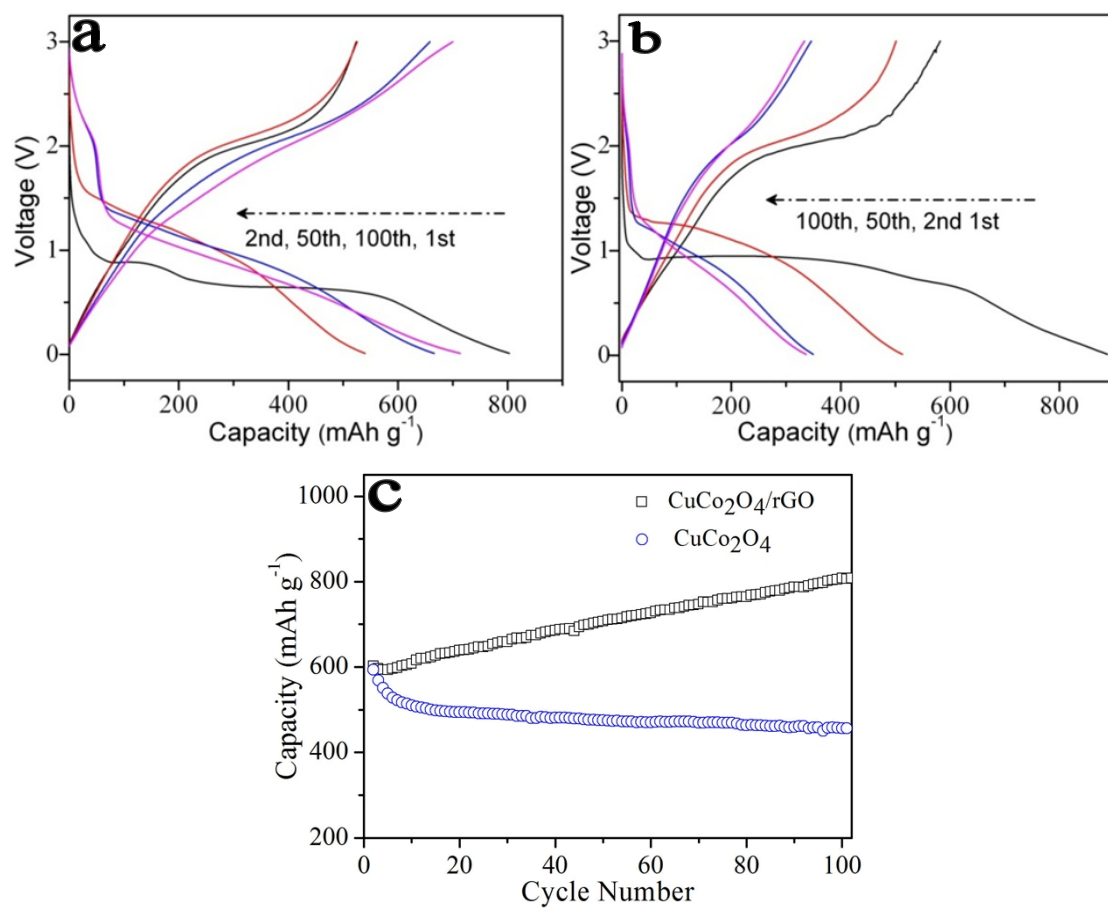

Fig. S6 Discharge-charge profiles of (a) CuCo<sub>2</sub>O<sub>4</sub>/rGO composite and (b) pristine CuCo<sub>2</sub>O<sub>4</sub> electrodes at current density of 1 A g<sup>-1</sup>; (c) Cycling performance at the current density of 0.2 A g<sup>-1</sup>.



**Tab. S1 A summary for the lithium storage capabilities of as-prepared porous CuCo<sub>2</sub>O<sub>4</sub> nanocubes/rGO composite, and other Co-based binary metal oxide anode materials reported previously.**

| Material                             | Morphology                    | Residual capacity<br>(mAh g <sup>-1</sup> ) | Current<br>(A g <sup>-1</sup> ) | Ref.      |
|--------------------------------------|-------------------------------|---------------------------------------------|---------------------------------|-----------|
| CuCo <sub>2</sub> O <sub>4</sub> /GO | Porous cube                   | 572.1/350th cycle                           | 1.0                             | This work |
|                                      |                               | 471.7/350th cycle                           | 2.0                             |           |
|                                      |                               | 807.8/100th cycle                           | 0.2                             |           |
| CuCo <sub>2</sub> O <sub>4</sub>     | Porous cube                   | 298.1/350th cycle                           | 1.0                             | This work |
|                                      |                               | 250.6/350th cycle                           | 2.0                             |           |
| CuCo <sub>2</sub> O <sub>4</sub>     | Nanoparticle                  | ~750/50th cycle                             | 0.06                            | 19        |
|                                      |                               | 380/rate capability                         | 0.75                            |           |
| CuCo <sub>2</sub> O <sub>4</sub>     | Nanoparticle                  | 742/40th cycle                              | 0.06                            | 22        |
| CuCo <sub>2</sub> O <sub>4</sub>     | Porous structures             | 900/6th cycle                               | 0.06                            | 23        |
|                                      |                               | 246/rate capability                         | 0.87                            |           |
| MnCo <sub>2</sub> O <sub>4</sub>     | Microspheres                  | 610/100th cycle                             | 0.4                             | 17        |
| FeCo <sub>2</sub> O <sub>4</sub>     | Nanoparticle                  | ~750/50 <sup>th</sup> cycle                 | 0.06                            | 18        |
| MgCo <sub>2</sub> O <sub>4</sub>     | Nanorod                       | < 750/50th cycle                            | 0.06                            | 18        |
| ZnCo <sub>2</sub> O <sub>4</sub>     | Porous nanoflake              | ~750/50 <sup>th</sup> cycle                 | 0.08                            | 38        |
| Co <sub>3</sub> O <sub>4</sub>       | Nanocages                     | 864/50th cycle                              | ~0.18                           | 50        |
|                                      |                               | 450/rate capability                         | 1.8                             |           |
| Co <sub>3</sub> O <sub>4</sub>       | Octahedron                    | 714/50th cycle                              | 1.0                             | 51        |
|                                      | Cube                          | 387/50th cycle                              |                                 |           |
| Co <sub>3</sub> O <sub>4</sub>       | Chrysanthemum-Like structures | ~550/70th cycle                             | 0.1                             | 52        |
